# Supplementary material for: Acute multi-sgRNA knockdown of KEOPS complex genes reproduces the microcephaly phenotype of the stable knockout zebrafish model
Source: PLoS One. 2018 Jan 18;13(1):e0191503. doi: 10.1371/journal.pone.0191503 (PMC5773193; doi:10.1371/journal.pone.0191503)
Supplement: S8 Table — Raw data of Fig 5. (XLSX) [file pone.0191503.s011.xlsx]

## Sheet: osgep_acute_microcephaly
fish	length in um	head diameter in um	ration head to length
osgep_f1	4229.06	618.852	0.146333
osgep_f2	4115.46	586.766	0.142576
osgep_f3	4184.19	584.32	0.13965
osgep_f4	4112.89	587.155	0.14276
osgep_f5	4421.76	695.741	0.157345
osgep_f6	3958.42	631.277	0.159477
osgep_f7	4307.38	628.697	0.145958
osgep_f8	4092.92	617.973	0.150986
osgep_f9	4282.33	607.721	0.141914
osgep_f10	3944.05	562.484	0.142616
osgep_f11	4001.86	637.737	0.15936
osgep_f12	4096.51	576.972	0.140845
osgep_f13	4287.03	613.353	0.143072
osgep_f14	4154.6	616.138	0.148302
osgep_f15	4115.49	605.653	0.147164
osgep_f16	3681.35	582.09	0.158119
osgep_f17	4714.53	623.66	0.132285
osgep_f18	4058.7	600.862	0.148043
osgep_f19	3991.31	619.148	0.155124
osgep_f20	4302.27	608.84	0.141516
osgep_f21	4143.82	560.739	0.135319
osgep_f22	4265.94	593.043	0.139018
osgep_f23	4171.05	560.477	0.134373
osgep_f24	3533.84	574.481	0.162566
osgep_f25	4224.38	580.794	0.137486
osgep_f26	3561.83	563.433	0.158186
osgep_f27	4315.48	594.459	0.13775
osgep_f28	4414.44	599.744	0.13586
osgep_f29	3708.55	576.024	0.155323
osgep_f30	3963.18	604.549	0.152541
osgep_f31	4329.27	629.525	0.145411
scrambled_f1	4063.47	637.147	0.156799
scrambled_f2	4060.84	637.737	0.157046
scrambled_f3	4079.15	632.049	0.154946
scrambled_f4	4091.11	643.825	0.157372
scrambled_f5	4117.91	631.204	0.153283
scrambled_f6	3841.91	608.898	0.158488
scrambled_f7	4125.39	643.951	0.156095
scrambled_f8	4068.74	635.231	0.156125
scrambled_f9	4064.44	662.948	0.163109
scrambled_f10	4035.75	647.138	0.160351
scrambled_f11	3946.93	626.293	0.158679
scrambled_f12	3927.3	602.694	0.153463
scrambled_f13	3932.76	624.701	0.158845
scrambled_f14	3974.66	602.39	0.151558
scrambled_f15	4172.59	666.135	0.159645
scrambled_f16	4108	646.973	0.157491
scrambled_f17	4231.02	643.833	0.15217
scrambled_f18	3524.4	535.695	0.151996
scrambled_f19	4107.35	650.465	0.158366
scrambled_f20	4107.14	643.418	0.156658
scrambled_f21	4165.62	623.619	0.149706
scrambled_f22	3985.73	661.188	0.165889
scrambled_f23	3985.22	667.66	0.167534
scrambled_f24	4041.61	639.037	0.158115
scrambled_f25	3428.83	560.312	0.163412
scrambled_f26	3951.17	638.968	0.161716
scrambled_f27	3998.8	629.808	0.157499
scrambled_f28	4115.97	657.974	0.159859
scrambled_f29	3946.55	642.308	0.162752
uninjected_f1	4068.03	640.709	0.157499
uninjected_f2	4037.49	628.867	0.155757
uninjected_f3	4011.76	616.138	0.153583
uninjected_f4	3977.96	606.592	0.152488
uninjected_f5	4042.59	627.897	0.155321
uninjected_f6	4159.6	666.135	0.160144
uninjected_f7	3874.02	619.32	0.159865
uninjected_f8	4055.44	611.952	0.150896
uninjected_f9	4023.34	627.897	0.156064
uninjected_f10	4232	637.45	0.150626
uninjected_f11	4243.19	675.727	0.15925
uninjected_f12	4263.64	650.199	0.152499
uninjected_f13	4041.07	618.401	0.153029
uninjected_f14	3930.49	616.994	0.156976
uninjected_f15	4149.26	636.573	0.153418
uninjected_f16	3978.95	621.914	0.156301
uninjected_f17	4082.08	634.655	0.155473
uninjected_f18	3835.05	609.065	0.158816
uninjected_f19	4112.05	669.596	0.162838
uninjected_f20	4037.55	650.199	0.161038
uninjected_f21	4134.75	701.92	0.169761
uninjected_f22	3966.44	608.664	0.153454
uninjected_f23	4082.18	639.347	0.156619
uninjected_f24	4056.9	617.223	0.152142
uninjected_f25	3796.67	601.382	0.158397
uninjected_f26	3948	633.306	0.160412
uninjected_f27	3923.04	648.785	0.165378
uninjected_f28	4122.19	632.069	0.153333
uninjected_f29	3987.26	652.652	0.163684
uninjected_f30	4105.57	665.609	0.162123

## Sheet: osgep_stable_microcephaly
fish	length in um	head diameter in um	ration head to length	genotype
osgep_c.102_105del_f001	3874.88	621.619	0.160423	het
osgep_c.102_105del_f002	3168.96	470.517	0.148477	het
osgep_c.102_105del_f003	3959.22	630.983	0.15937	het
osgep_c.102_105del_f004	3647.16	631.007	0.173013	het
osgep_c.102_105del_f005	3532.36	506.943	0.143514	het
osgep_c.102_105del_f006	3621.42	586.499	0.161953	het
osgep_c.102_105del_f007	2920.85	404.767	0.138579	hom
osgep_c.102_105del_f008	3124.69	417.025	0.133461	hom
osgep_c.102_105del_f009	3908.92	608.676	0.155715	het
osgep_c.102_105del_f010	3604.64	579.996	0.160902	wt
osgep_c.102_105del_f011	3716.24	596.772	0.160585	het
osgep_c.102_105del_f012	3542.5	456.984	0.129	hom
osgep_c.102_105del_f013	3864.34	592.743	0.153388	het
osgep_c.102_105del_f014	3473.94	462.089	0.133016	hom
osgep_c.102_105del_f015	3132.39	376.697	0.120259	hom
osgep_c.102_105del_f016	3889.81	595.921	0.153201	wt
osgep_c.102_105del_f017	3145.3	420.689	0.133751	hom
osgep_c.102_105del_f018	3320.7	455.715	0.137235	hom
osgep_c.102_105del_f019	3826.84	574.887	0.150225	het
osgep_c.102_105del_f020	3819.06	593.282	0.155348	wt
osgep_c.102_105del_f021	3586.12	462.177	0.128879	hom
osgep_c.102_105del_f022	3644.72	522.713	0.143416	wt
osgep_c.102_105del_f023	3426.34	551.758	0.161034	het
osgep_c.102_105del_f024	3556.11	503.999	0.141728	hom
osgep_c.102_105del_f025	3604.62	478.054	0.132623	hom
osgep_c.102_105del_f026	2715.42	375.116	0.138143	hom
osgep_c.102_105del_f027	3250.05	439.874	0.135344	hom
osgep_c.102_105del_f028	3180.68	430.965	0.135494	hom
osgep_c.102_105del_f029	3657.86	476.117	0.130163	hom
osgep_c.102_105del_f030	3237.64	426.178	0.131632	hom
osgep_c.102_105del_f031	3551.44	481.24	0.135505	hom
osgep_c.102_105del_f032	3455.5	486.435	0.140771	hom
osgep_c.102_105del_f033	3403.35	431.636	0.126827	hom
osgep_c.102_105del_f034	3525.83	468.625	0.132912	hom
osgep_c.102_105del_f035	2898.81	382.515	0.131956	hom
osgep_c.102_105del_f036	2693.02	359.241	0.133397	hom
osgep_c.102_105del_f037	3454.12	475.21	0.137578	hom
osgep_c.102_105del_f038	3059.3	404.365	0.132176	hom
osgep_c.102_105del_f039	3485.55	444.102	0.127412	hom
osgep_c.102_105del_f040	3711.28	586.361	0.157994	het
osgep_c.102_105del_f041	3747.48	593.282	0.158315	het
osgep_c.102_105del_f042	3400.55	478.011	0.140569	hom
osgep_c.102_105del_f043	3137.31	433.819	0.138278	hom
osgep_c.102_105del_f044	3171.6	412.483	0.130055	hom
osgep_c.102_105del_f045	2891.4	382.887	0.132423	hom
osgep_c.102_105del_f046	3277.33	434.146	0.132469	hom
osgep_c.102_105del_f047	2952.68	384.316	0.130158	hom
osgep_c.102_105del_f048	3382.63	464.227	0.137238	hom
osgep_c.102_105del_f049	3772.81	586.672	0.1555	het
osgep_c.102_105del_f050	3656.95	573.693	0.156877	wt
osgep_c.102_105del_f051	3566.36	558.417	0.156579	het
osgep_c.102_105del_f052	3682.14	596.338	0.161954	het
osgep_c.102_105del_f053	3989.07	605.557	0.151804	wt
osgep_c.102_105del_f054	3921.22	573.693	0.146305	wt
osgep_c.102_105del_f055	3630.64	592.811	0.16328	het
osgep_c.102_105del_f056	3826.42	586.361	0.15324	wt
osgep_c.102_105del_f057	3571.44	564.09	0.157945	het
osgep_c.102_105del_f058	3569.58	509.889	0.142843	hom
osgep_c.102_105del_f059	3344.81	529.345	0.158258	wt
osgep_c.102_105del_f060	3362.06	434.345	0.12919	hom
osgep_c.102_105del_f061	3799.88	580.416	0.152746	het
osgep_c.102_105del_f062	3944.04	621.423	0.15756	het
osgep_c.102_105del_f063	3420.53	538.644	0.157474	wt
osgep_c.102_105del_f064	3853.29	564.198	0.14642	het
osgep_c.102_105del_f065	3585.66	483.262	0.134776	hom
osgep_c.102_105del_f066	3537.61	576.836	0.163058	het
osgep_c.102_105del_f067	3907.32	596.134	0.152569	het
osgep_c.102_105del_f068	3718.86	484.385	0.130251	hom
osgep_c.102_105del_f069	3704.55	607.9	0.164096	het
osgep_c.102_105del_f070	3682.72	578.067	0.156968	het
osgep_c.102_105del_f071	3662.63	589.625	0.160984	wt
osgep_c.102_105del_f072	3498.13	564.279	0.161309	het
osgep_c.102_105del_f073	3762.66	637.994	0.169559	het
osgep_c.102_105del_f074	3867.2	616.229	0.159348	het
osgep_c.102_105del_f075	3746.13	586.361	0.156525	wt
osgep_c.102_105del_f076	4003.84	619.049	0.154614	het
osgep_c.102_105del_f077	3794.31	645.455	0.170111	wt
osgep_c.102_105del_f078	3876.81	583.183	0.150429	wt
osgep_c.102_105del_f079	3934.55	605.615	0.153922	wt
osgep_c.102_105del_f080	3882.26	624.634	0.160894	het
osgep_c.102_105del_f081	4068.69	617.151	0.151683	het
osgep_c.102_105del_f082	3891.27	586.785	0.150795	het
osgep_c.102_105del_f083	3972.89	648.038	0.163115	wt
osgep_c.102_105del_f084	3767.27	599.142	0.159039	wt
osgep_c.102_105del_f085	3832.75	632.133	0.164929	het
osgep_c.102_105del_f086	3862.64	599.116	0.155105	het
osgep_c.102_105del_f087	3984.35	645.266	0.16195	wt
osgep_c.102_105del_f088	3502.94	511.827	0.146114	hom
osgep_c.102_105del_f089	3796.05	628.08	0.165456	wt
osgep_c.102_105del_f090	4024.08	649.917	0.161507	het
osgep_c.102_105del_f091	3796.13	614.984	0.162003	het
osgep_c.102_105del_f092	3819.75	647.168	0.169427	wt
osgep_c.102_105del_f093	3580.15	572.169	0.159817	het
osgep_c.102_105del_f094	3595.43	484.395	0.134725	hom
osgep_c.102_105del_f095	3783.22	618.893	0.163589	het
osgep_c.102_105del_f096	3797.24	625.414	0.164702	het
osgep_c.102_105del_f097	3786.71	577.364	0.152471	het
osgep_c.102_105del_f098	3960.8	631.048	0.159323	wt
osgep_c.102_105del_f099	3839.55	628.952	0.163809	wt
osgep_c.102_105del_f100	3831.3	634.17	0.165523	wt
osgep_c.102_105del_f101	3857.11	627.918	0.162795	het
osgep_c.102_105del_f102	3689.54	592.331	0.160543	het
osgep_c.102_105del_f103	3995.58	592.948	0.148401	het
osgep_c.102_105del_f104	3870.71	624.732	0.1614	wt
osgep_c.102_105del_f105	3984.42	634.194	0.159169	wt
osgep_c.102_105del_f106	3860.96	611.987	0.158507	het
osgep_c.102_105del_f107	3772.48	606.319	0.160722	wt
osgep_c.102_105del_f108	3800.5	617.711	0.162534	het
osgep_c.102_105del_f109	3845.58	624.732	0.162455	het
osgep_c.102_105del_f110	3870.79	615.116	0.158912	het
osgep_c.102_105del_f111	3985.8	615.339	0.154383	het
osgep_c.102_105del_f112	4055.5	634.194	0.156379	wt
osgep_c.102_105del_f113	3861.88	618.236	0.160087	het
osgep_c.102_105del_f114	3824.08	606.495	0.158599	het
osgep_c.102_105del_f115	3750.31	596.057	0.158935	het
osgep_c.102_105del_f116	3893.78	602.37	0.154701	het
osgep_c.102_105del_f117	3904.47	643.73	0.16487	wt
osgep_c.102_105del_f118	3982.09	618.63	0.155353	het
osgep_c.102_105del_f119	4159.97	637.548	0.153258	wt
osgep_c.102_105del_f120	3645.25	602.834	0.165375	het
osgep_c.102_105del_f121	3720.04	576.801	0.155052	het
osgep_c.102_105del_f122	3855.94	609.077	0.157958	het
osgep_c.102_105del_f123	3652.34	609.202	0.166798	het
osgep_c.102_105del_f124	4020.48	643.73	0.160113	het
osgep_c.102_105del_f125	3788.05	626.428	0.165369	het
osgep_c.102_105del_f126	3890.67	631.104	0.16221	wt
osgep_c.102_105del_f127	4110.2	656.964	0.159837	het
osgep_c.102_105del_f128	3843.3	612.261	0.159306	het

## Sheet: tprkb_acute_microcephaly
fish	length in um	head diameter in um	ration head to length
tprkb_f1	4233.65	602.294	0.142263
tprkb_f2	4341.18	596.057	0.137303
tprkb_f3	4331.35	618.228	0.142733
tprkb_f4	4383.46	584.574	0.133359
tprkb_f5	3937.65	557.452	0.14157
tprkb_f6	4232.91	608.876	0.143843
tprkb_f7	4007.75	611.863	0.15267
tprkb_f8	4287.45	597.835	0.139438
tprkb_f9	4400.17	599.252	0.136188
tprkb_f10	4194.96	595.998	0.142075
tprkb_f11	4165.6	595.929	0.14306
tprkb_f12	4119.89	577.513	0.140177
tprkb_f13	4253.19	608.876	0.143158
tprkb_f14	4267.94	605.557	0.141885
tprkb_f15	3782.51	570.427	0.150806
tprkb_f16	4228.9	608.668	0.14393
tprkb_f17	4153.8	608.876	0.146583
tprkb_f18	4410.23	584.487	0.13253
tprkb_f19	4251.17	602.429	0.141709
tprkb_f20	4380.58	620.944	0.141749
tprkb_f21	3867.61	622.925	0.161062
tprkb_f22	4312.67	606.093	0.140538
tprkb_f23	4060.3	556.586	0.13708
tprkb_f24	4092.28	615.446	0.150392
tprkb_f25	4233.84	621.423	0.146775
tprkb_f26	4247.14	622.231	0.146506
tprkb_f27	4559.91	615.462	0.134972
tprkb_f28	4449.43	614.306	0.138064
scrambled_f1	4168.94	634.162	0.152116
scrambled_f2	4074.1	646.979	0.158803
scrambled_f3	3995.98	666.029	0.166675
scrambled_f4	4045.68	643.793	0.159131
scrambled_f5	4085.86	637.349	0.155989
scrambled_f6	4178.98	631.948	0.15122
scrambled_f7	4082.76	627.861	0.153784
scrambled_f8	4075.09	646.909	0.158747
scrambled_f9	3975.07	638.495	0.160625
scrambled_f10	4047.2	648.602	0.16026
scrambled_f11	4092.82	650.127	0.158846
scrambled_f12	3883.25	606.688	0.156232
scrambled_f13	4245.91	650.478	0.153201
scrambled_f14	4111.68	618.36	0.150391
scrambled_f15	4123.75	633.577	0.153641
scrambled_f16	4133.27	646.979	0.15653
scrambled_f17	4179.74	651.04	0.155761
scrambled_f18	4006.98	669.224	0.167015
scrambled_f19	4053.33	637.42	0.157258
scrambled_f20	4191.11	661.163	0.157754
scrambled_f21	4101.91	637.357	0.15538
scrambled_f22	4262.74	647.034	0.151788
scrambled_f23	3971.49	595.998	0.150069
scrambled_f24	4112.49	631.49	0.153554
scrambled_f25	3960.09	600.132	0.151545
scrambled_f26	4131.78	647.293	0.156662
scrambled_f27	4122.37	641.193	0.15554
scrambled_f28	4050.83	656.5	0.162066
scrambled_f29	4403.49	725.472	0.164749
scrambled_f30	4215.3	637.619	0.151263
uninjected_f1	3769.59	648.038	0.171912
uninjected_f2	4264.4	656.469	0.153942
uninjected_f3	4263.4	669.383	0.157007
uninjected_f4	4037.04	676.498	0.167573
uninjected_f5	4215.16	654.222	0.155207
uninjected_f6	4138.45	644.109	0.15564
uninjected_f7	4276.43	668.776	0.156387
uninjected_f8	4313.62	630.983	0.146277
uninjected_f9	4144.9	642.309	0.154964
uninjected_f10	4259.45	635.849	0.149279
uninjected_f11	4109.38	628.597	0.152966
uninjected_f12	4218.15	644.857	0.152877
uninjected_f13	4316.71	628.5	0.145597
uninjected_f14	4174.43	635.514	0.15224
uninjected_f15	4081.12	621.415	0.152266
uninjected_f16	4087.77	634.162	0.155136
uninjected_f17	3968.28	595.162	0.14998
uninjected_f18	4033.09	615.041	0.152499
uninjected_f19	4149.98	638.145	0.15377
uninjected_f20	4334.59	630.234	0.145396
uninjected_f21	4223.26	631.667	0.149569
uninjected_f22	4276.76	687.776	0.160817
uninjected_f23	3994.44	622.231	0.155774
uninjected_f24	4132.97	625.26	0.151286

## Sheet: tprkb_stable_microcephaly
fish	length in um	head diameter in um	ration head to length	genotype
tprkb_c.370_376delinsAA_f001	4128.84	685.216	0.165958	wt
tprkb_c.370_376delinsAA_f002	4060.26	659.848	0.162514	hom
tprkb_c.370_376delinsAA_f003	4223.3	628.185	0.148743	hom
tprkb_c.370_376delinsAA_f004	3916.52	699.757	0.178668	het
tprkb_c.370_376delinsAA_f005	4122.59	706.739	0.171431	het
tprkb_c.370_376delinsAA_f006	4094.59	679.681	0.165995	het
tprkb_c.370_376delinsAA_f007	4055.62	685.15	0.168939	het
tprkb_c.370_376delinsAA_f008	4311.5	693.4	0.160826	het
tprkb_c.370_376delinsAA_f009	4388.65	696.462	0.158696	het
tprkb_c.370_376delinsAA_f010	4096.89	685.179	0.167244	het
tprkb_c.370_376delinsAA_f011	4284.92	644.857	0.150495	hom
tprkb_c.370_376delinsAA_f012	4304.17	645.471	0.149964	hom
tprkb_c.370_376delinsAA_f013	4290.99	679.143	0.158272	het
tprkb_c.370_376delinsAA_f014	4113.32	646.87	0.157262	hom
tprkb_c.370_376delinsAA_f015	4431.94	669.201	0.150995	hom
tprkb_c.370_376delinsAA_f016	4518.39	753.326	0.166725	het
tprkb_c.370_376delinsAA_f017	4223.99	727.276	0.172177	wt
tprkb_c.370_376delinsAA_f018	4137.71	663.463	0.160345	het
tprkb_c.370_376delinsAA_f019	3944.93	675.958	0.171348	het
tprkb_c.370_376delinsAA_f020	4037.41	637.994	0.158021	het
tprkb_c.370_376delinsAA_f021	4153.31	711.101	0.171213	het
tprkb_c.370_376delinsAA_f022	4137.96	727.025	0.175697	het
tprkb_c.370_376delinsAA_f023	4319.23	682.566	0.15803	het
tprkb_c.370_376delinsAA_f024	4182.33	680.039	0.162598	het
tprkb_c.370_376delinsAA_f025	4193.07	691.883	0.165006	het
tprkb_c.370_376delinsAA_f026	4258.21	662.843	0.155662	hom
tprkb_c.370_376delinsAA_f027	4160.4	717.272	0.172405	het
tprkb_c.370_376delinsAA_f028	4172.82	707.486	0.169546	wt
tprkb_c.370_376delinsAA_f029	4409.05	639.107	0.144954	hom
tprkb_c.370_376delinsAA_f030	4221.6	624.675	0.147971	hom
tprkb_c.370_376delinsAA_f031	4562.49	711.158	0.15587	wt
tprkb_c.370_376delinsAA_f032	4126.21	669.284	0.162203	wt
tprkb_c.370_376delinsAA_f033	3884.28	652.66	0.168026	het
tprkb_c.370_376delinsAA_f034	3807.44	698.253	0.183392	het
tprkb_c.370_376delinsAA_f035	4400.89	713.439	0.162112	het
tprkb_c.370_376delinsAA_f036	4500.16	720.359	0.160074	het
tprkb_c.370_376delinsAA_f037	4275.38	736.476	0.17226	het
tprkb_c.370_376delinsAA_f038	4390.62	708.44	0.161353	het
tprkb_c.370_376delinsAA_f039	4202.12	666.647	0.158645	het
tprkb_c.370_376delinsAA_f040	4335.17	665.785	0.153578	wt
tprkb_c.370_376delinsAA_f041	4548.91	712.414	0.156612	hom
tprkb_c.370_376delinsAA_f042	4477.92	726.829	0.162314	hom
tprkb_c.370_376delinsAA_f043	4404.32	668.107	0.151694	het
tprkb_c.370_376delinsAA_f044	4312.78	698.907	0.162055	het
tprkb_c.370_376delinsAA_f045	4159.02	683.257	0.164283	het
tprkb_c.370_376delinsAA_f046	4344	707.959	0.162974	het
tprkb_c.370_376delinsAA_f047	4773.41	718.171	0.150452	wt
tprkb_c.370_376delinsAA_f048	4599.17	732.618	0.159293	hom
tprkb_c.370_376delinsAA_f049	4253.66	704.27	0.165568	wt
tprkb_c.370_376delinsAA_f050	4368.28	721.338	0.165131	het
tprkb_c.370_376delinsAA_f051	4367.74	708.755	0.16227	het
tprkb_c.370_376delinsAA_f052	4361.94	636.081	0.145825	het
tprkb_c.370_376delinsAA_f053	4440.75	694.227	0.156331	het
tprkb_c.370_376delinsAA_f054	4579.01	707.687	0.15455	wt
tprkb_c.370_376delinsAA_f055	4528.52	682.901	0.1508	het
tprkb_c.370_376delinsAA_f056	4423.78	711.072	0.160738	het
tprkb_c.370_376delinsAA_f057	4610.16	638.185	0.13843	hom
tprkb_c.370_376delinsAA_f058	4363.91	689.648	0.158034	het
tprkb_c.370_376delinsAA_f059	4597.75	736.917	0.160278	wt
tprkb_c.370_376delinsAA_f060	4496.28	662.728	0.147395	het
tprkb_c.370_376delinsAA_f061	4341.96	702.848	0.161873	hom
tprkb_c.370_376delinsAA_f062	3959.26	675.387	0.170584	wt
tprkb_c.370_376delinsAA_f063	4528.76	715.458	0.157981	wt
tprkb_c.370_376delinsAA_f064	4394.77	637.428	0.145042	hom
tprkb_c.370_376delinsAA_f065	4407.39	700.982	0.159047	het
tprkb_c.370_376delinsAA_f066	4240.48	669.982	0.157997	het
tprkb_c.370_376delinsAA_f067	4168.02	698.907	0.167683	het
tprkb_c.370_376delinsAA_f068	4189.4	707.342	0.168841	het
tprkb_c.370_376delinsAA_f069	4342.52	698.907	0.160945	het
tprkb_c.370_376delinsAA_f070	4286.49	651.508	0.151991	hom
tprkb_c.370_376delinsAA_f071	3892.73	813.269	0.20892	hom
tprkb_c.370_376delinsAA_f072	4315.46	651.251	0.150911	hom
tprkb_c.370_376delinsAA_f073	4327.72	751.268	0.173594	het
tprkb_c.370_376delinsAA_f074	4118.37	646.658	0.157018	het
tprkb_c.370_376delinsAA_f075	4320.03	689.781	0.15967	het
tprkb_c.370_376delinsAA_f076	4399	674.152	0.153251	hom
tprkb_c.370_376delinsAA_f077	4469.89	682.663	0.152725	wt
tprkb_c.370_376delinsAA_f078	4192.92	607.741	0.144945	hom
tprkb_c.370_376delinsAA_f079	4475.9	725.92	0.162184	wt
tprkb_c.370_376delinsAA_f080	4316.34	698.304	0.161781	wt
tprkb_c.370_376delinsAA_f081	4422.26	675.003	0.152638	hom
tprkb_c.370_376delinsAA_f082	4513.92	700.982	0.155293	het
tprkb_c.370_376delinsAA_f083	4289.6	694.63	0.161933	het
tprkb_c.370_376delinsAA_f084	4278.57	683.131	0.159663	het
tprkb_c.370_376delinsAA_f085	4200.75	670.921	0.159715	het
tprkb_c.370_376delinsAA_f086	4268.29	674.845	0.158107	wt
tprkb_c.370_376delinsAA_f087	4288.76	720.655	0.168033	het
tprkb_c.370_376delinsAA_f088	4148.91	708.002	0.170648	het
tprkb_c.370_376delinsAA_f089	4278.57	683.131	0.159663	het
tprkb_c.370_376delinsAA_f090	4288.51	724.933	0.169041	wt
tprkb_c.370_376delinsAA_f091	4352.28	650.111	0.149373	hom
tprkb_c.370_376delinsAA_f092	4203.32	673.014	0.160115	het
